# Supplementary material for: Recurrent otalgia in adults
Source: HighWire-hosted journal article supplement (doi:10.1136/bmj.i3917), 2016-09-15
Supplement: bmj.i3917.pdf [file bmj.i3917.pdf]

## 10分钟会诊

## 成人复发性耳痛

## 10-Minute Consultation

## Recurrent otalgia in adults

来源:BMJ 2016; 354: i3917 doi: 10.1136/bmj.i3917

一位43岁男性患者,出现右侧耳痛。他在过去一年中,有2~3次类似发作,并用滴耳剂治疗。但患者并不能确定耳痛只在右侧发作。

耳痛是常见症状,通常由中耳炎、外耳道炎导致<sup>1</sup>。虽然复发性耳痛的病因数据缺乏,但在英国,成人的外耳道炎年发病率超过1%,造成很大的疾病负担<sup>2</sup>。咽鼓管功能障碍、乳突炎、牵涉痛或恶性肿瘤很少导致复发性耳痛。

## 你需要考虑什么

首先要考虑耳痛是原发的(源自耳朵本身)还是继发的(牵涉痛)。恶性肿瘤常只表现为单侧症状。询问相关的耳科症状,如耳聋、耳漏及既往耳鼻喉科病史和手术史,可除外继发性耳痛。除了耳朵疾病,复发性耳痛也可以是由其他部位疾病牵涉所致,因此需询问有无吞咽、咀嚼及面部疼痛等症状。听力下降和耳鸣的症状对确定诊断也有帮助。

浅表疼痛是典型的外耳道炎症状,患者会有患侧或双侧耳部的疼痛或发痒,询问外耳道炎相关的疾病,包括湿疹或糖尿病等,有无暴露于水、使用棉棒<sup>3</sup>、耳机或助听器,这些情况会刺激外耳道,引起外耳道炎。

深部剧烈疼痛常提示急性中耳炎,有时与上呼吸道感染有关。头晕常提示继发性迷路炎。

咽鼓管功能障碍所致的耳痛患者,常有间歇性耳闷、耳胀伴劈劈啪啪声。

持续4周以上的疼痛需怀疑恶性肿瘤,特别是耳镜检查正常并有肿瘤危险因素如吸烟酗酒者,更是如此。

询问患者有无耳道分泌物。中耳炎患者,破裂的鼓膜常会产生黏液、脓液、非刺激的气味。外耳道炎分泌物更严重,有刺激味,并与中耳炎一样,可混有血丝。胆脂瘤分泌物常持续,刺激气味重,但常无疼痛症状<sup>4,5</sup>。

## 你需要知道

- 外耳炎是成人复发性耳痛的最常见病因。
- 外耳炎的持续性症状常是因为不正确的治疗措施或未能很好地控制诱发因素所致。
- 避免诱发因素的简单建议及使用滴耳液就能避免外耳炎的复发与加重。

外耳道炎常无系统性症状,中耳炎可伴有上呼吸道感染的症状。成人乳突炎少见(年发病率约十万分之一),但可出现脓毒症<sup>6</sup>。恶性肿瘤可出现体重减轻和局部原发肿瘤的相关症状。

## 你应该做什么

检查耳朵。从外耳和耳周围开始,看有无红斑、肿胀或皮肤疾病,移动或按压耳廓有无疼痛,这些提示外耳道炎(图1)。

向上、向后轻拉耳廓,用耳镜检查耳道和鼓膜。外耳炎时,因为肿胀的耳壁、碎片及分泌物,耳道可能会狭窄。坏死性外耳道炎,如果耳道下壁有炎症或肉芽组织,需注意有无外来异物。

鼓膜后液体、听力下降、鼓膜鼓胀或穿孔常提示急性中耳炎(图2)。鼓室鼓胀或波动感并有乳突压痛、耳后红斑,伴全身不适常提示乳突炎。鼓膜深陷、角质生长或持续的蜡壳形成(特别是耳道上方)应排除胆脂瘤。复发性感染性胆脂瘤在成人的年发病率为9/10万左右<sup>7</sup>,相对少见,但可引起继发性外耳道炎,导致耳痛。

如果诊断是复发性外耳道炎,可镇痛,并使用当地抗菌指南推荐的抗生素滴剂或喷剂治疗。哪种外用药物更好,目前缺少证据。如果有鼓膜穿孔,应考虑药物耳毒性的风险<sup>8</sup>。

如果症状持续超过1周,应做微生物学拭子检查<sup>9</sup>,症状缓解后,继续外用药物最多不超过14天<sup>8</sup>,这可降低继发真菌感染的风险。向患者解释如何使用滴耳液(见框图1)。治疗评估可参照坏死性外耳道炎、外耳蜂窝组织炎患者。

识别和避免诱发因素。一定要建议患者保持耳朵干燥。沐浴或游泳后,使用醋酸喷雾预防或会有帮助,虽然没有证据表明它能减少发作<sup>10</sup>。告诉患者关于掏耳周期和“不要把比你肘部小的东西放入耳朵里”的重要性。

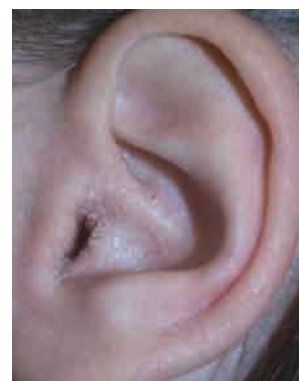

图1 外耳道轻度的干燥皮屑可提示外耳道炎的诊断

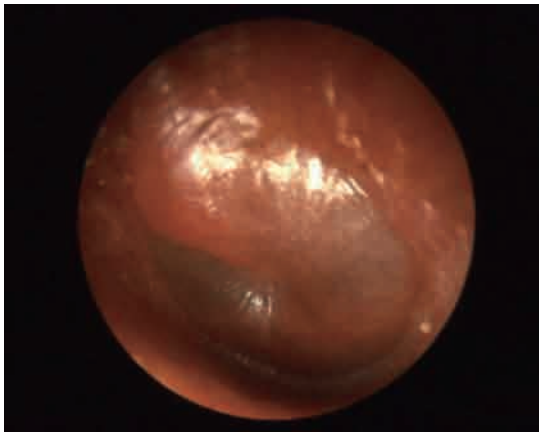

图2 中耳炎鼓膜鼓胀的典型表现

外耳道炎患者局部治疗2周后,如持续性症状没有改善,需怀疑诊断。复发性或持续性中耳炎在成人是不常见的。这些患者需探查咽鼓管阻塞物以排除鼻咽肿瘤<sup>11</sup>。

### 什么时候转诊

立刻转诊:如怀疑坏死性外耳道炎或外耳蜂窝织炎。

急诊:大的外耳道碎片、耳屎或油脂造成外耳道狭窄或堵塞,引起顽固性外耳道炎。

预约2周:超过4周的耳痛。

预约(4~6周):不明原因的复发性急性中耳炎或怀疑胆脂瘤。

Samuel Finnikin *academic general practitioner*<sup>1</sup>, Alistair Mitchell-Innes *ear, nose, and throat registrar*<sup>2</sup>

<sup>1</sup>Department of Primary Care Clinical Sciences, University of Birmingham, Birmingham, UK;

<sup>2</sup>University Hospital Birmingham

Correspondence to: finnicksj@bham.ac.uk

利益竞争 (Competing interests): We have read and understood BMJ policy on declaration of interests and declare the following interests: None.

### 框图1 如何使用滴耳液

滴一个耳朵约需5分钟时间。可考虑请人帮忙。

- 1: 躺下,患耳朝上。
- 2: 耳朵往上拉。
- 3: 往耳内滴入所需滴数
- 4: 保持这个姿势至少3分钟
- 5: 轻压外耳(耳屏)以使液滴分布均匀并排出气泡。

### 学以致用

你向患者介绍如何使用滴耳液了吗?

### 患者参与

在文章录用后,我们询问了作者关于涉及患者及利益捐赠的情况。

来源与同行评议 (Provenance and peer review): Commissioned; externally peer reviewed.

### 参考文献

- 1 Kozin ED, Sethi RK, Remenschneider AK, et al. Epidemiology of otologic diagnoses in United States emergency departments. *Laryngoscope* 2015;125:1926-33.pmid:25702897.
- 2 Rowlands S, Devalia H, Smith C, Hubbard R, Dean A. Otitis externa in UK general practice: a survey using the UK General Practice Research Database. *Br J Gen Pract* 2001;51:533-8.pmid:11462312.
- 3 Nussinovitch M, Rimon A, Volovitz B, Raveh E, Prais D, Amir J. Cotton-tip applicators as a leading cause of otitis externa. *Int J Pediatr Otorhinolaryngol* 2004;68:433-5.pmid:15013609.
- 4 Tikka T, Pracy P, Paleri V. Refining the head and neck cancer referral guidelines: a two-centre analysis of 4715 referrals. *Clin Otolaryngol* 2016;41:66-75.pmid:26611658.
- 5 Mehanna H, Paleri V, West CM, Nutting C. Head and neck cancer--Part 1: Epidemiology, presentation, and prevention. *BMJ* 2010;341:c4684.pmid:20855405.
- 6 Palma S, Bovo R, Benatti A, et al. Mastoiditis in adults: a 19-year retrospective study. *Eur Arch Otorhinolaryngol* 2014;271:925-31.pmid:23589156.
- 7 Olszewska E, Wagner M, Bernal-Sprekelsen M, et al. Etiopathogenesis of cholesteatoma. *Eur Arch Otorhinolaryngol* 2004;261:6-24.pmid:12835944.
- 8 Kaushik V, Malik T, Saeed SR. Interventions for acute otitis externa. *Cochrane Database Syst Rev* 2010;(1):CD004740.pmid:20091565.
- 9 Llor C, McNulty CA, Butler CC. Ordering and interpreting ear swabs in otitis externa. *BMJ* 2014;349:g5259.pmid:25179670.
- 10 Hajioff D, Mackeith S. Otitis externa. *BMJ Clin Evid* 2008;2008:0510.pmid:19450296.
- 11 Dang PT, Gubbels SP. Is nasopharyngoscopy necessary in adult-onset otitis media with effusion? *Laryngoscope* 2013;123:2081-2.pmid:23404463.

(本文特邀优秀译者:北京协和医院神经内科  
李力波 译 高晶 校)

(本文英文原文见本刊第2017年第9期第534页)

BMJ takes no responsibility for the accuracy of the translation from the published English language original and is not liable for any errors that may occur.

**BMJ**
